# Supplementary material for: Phase behaviour and conductivity study of electrolytes in supercritical hydrofluorocarbons
Source: Royal Society of Chemistry journal article supplement (doi:10.1039/c0cp01202e), 2010-11-12
Supplement: c0cp01202e.pdf [file c0cp01202e.pdf]

**Supplementary materials**

Table S1 Experimental  $p$ - $T$  data for the binary systems of  $[\text{NBu}^n_4][\text{BF}_4] + \text{HFC}$

| $x_1 \times 10^3$                                             | $T/\text{K}$ | $p/\text{MPa}$ | $x_1 \times 10^3$ | $T/\text{K}$ | $p/\text{MPa}$ | $x_1 \times 10^3$ | $T/\text{K}$ | $p/\text{MPa}$ |
|---------------------------------------------------------------|--------------|----------------|-------------------|--------------|----------------|-------------------|--------------|----------------|
| $[\text{NBu}^n_4][\text{BF}_4](1) + \text{CHF}_3(2)$          |              |                |                   |              |                |                   |              |                |
| 0.82                                                          | 293.9        | 4.32           | 1.59              | 328.3        | 12.38          | 4.83              | 313.2        | 10.34          |
| 0.82                                                          | 297.5        | 4.71           | 2.44              | 293.1        | 4.39           | 4.83              | 318.2        | 11.72          |
| 0.82                                                          | 301.0        | 5.38           | 2.44              | 297.7        | 5.62           | 4.83              | 323.1        | 13.08          |
| 0.82                                                          | 304.2        | 6.07           | 2.44              | 299.3        | 6.02           | 4.83              | 328.2        | 14.47          |
| 0.82                                                          | 308.3        | 7.00           | 2.44              | 300.7        | 6.41           | 6.90              | 292.4        | 4.56           |
| 0.82                                                          | 316.1        | 8.64           | 2.44              | 303.0        | 7.04           | 6.90              | 294.5        | 5.19           |
| 0.82                                                          | 318.8        | 9.27           | 2.44              | 308.1        | 8.36           | 6.90              | 296.6        | 5.85           |
| 0.82                                                          | 323.5        | 10.30          | 2.44              | 313.2        | 9.73           | 6.90              | 299.3        | 6.67           |
| 0.82                                                          | 328.4        | 11.36          | 2.44              | 318.0        | 10.87          | 6.90              | 301.8        | 7.41           |
| 1.59                                                          | 293.7        | 4.29           | 2.44              | 323.1        | 12.30          | 6.90              | 303.2        | 7.79           |
| 1.59                                                          | 296.5        | 4.71           | 2.44              | 328.1        | 13.55          | 6.90              | 309.0        | 9.42           |
| 1.59                                                          | 299.3        | 5.37           | 4.83              | 293.4        | 4.57           | 6.90              | 313.2        | 10.58          |
| 1.59                                                          | 301.1        | 5.82           | 4.83              | 295.3        | 5.13           | 6.90              | 318.4        | 11.96          |
| 1.59                                                          | 303.3        | 6.35           | 4.83              | 297.2        | 5.72           | 6.90              | 323.2        | 13.28          |
| 1.59                                                          | 308.3        | 7.56           | 4.83              | 299.6        | 6.40           | 6.90              | 328.5        | 14.67          |
| 1.59                                                          | 313.2        | 8.79           | 4.83              | 300.7        | 6.76           |                   |              |                |
| 1.59                                                          | 318.2        | 10.00          | 4.83              | 303.2        | 7.50           |                   |              |                |
| 1.59                                                          | 323.2        | 11.20          | 4.83              | 308.0        | 8.86           |                   |              |                |
| $[\text{NBu}^n_4][\text{BF}_4](1) + \text{CH}_2\text{F}_2(2)$ |              |                |                   |              |                |                   |              |                |
| 1.67                                                          | 296.5        | 1.91           | 2.55              | 323.2        | 3.47           | 3.29              | 343.5        | 5.29           |
| 1.67                                                          | 302.7        | 2.21           | 2.55              | 333.2        | 4.28           | 3.29              | 348.0        | 5.90           |
| 1.67                                                          | 311.5        | 2.69           | 2.55              | 343.0        | 5.26           | 3.29              | 351.2        | 6.58           |
| 1.67                                                          | 313.0        | 2.77           | 2.55              | 350.8        | 6.40           | 3.29              | 353.2        | 7.02           |
| 1.67                                                          | 321.2        | 3.36           | 2.55              | 352.1        | 6.49           | 3.29              | 357.9        | 8.10           |

Supplementary Material (ESI) for *PCCP*  
This journal is © the Owner Societies 2010

|      |       |      |      |       |      |      |       |      |
|------|-------|------|------|-------|------|------|-------|------|
| 1.67 | 322.4 | 3.41 | 2.55 | 352.9 | 6.84 | 3.29 | 363.2 | 9.24 |
| 1.67 | 331.1 | 4.19 | 2.55 | 357.6 | 7.78 | 4.17 | 296.4 | 1.86 |
| 1.67 | 332.7 | 4.30 | 2.55 | 358.0 | 7.81 | 4.17 | 312.7 | 2.74 |
| 1.67 | 343.4 | 5.28 | 2.55 | 363.2 | 8.89 | 4.17 | 322.9 | 3.45 |
| 1.67 | 353.0 | 6.56 | 3.29 | 295.4 | 1.81 | 4.17 | 333.1 | 4.30 |
| 1.67 | 357.8 | 7.34 | 3.29 | 303.2 | 2.21 | 4.17 | 343.1 | 5.30 |
| 1.67 | 363.2 | 8.34 | 3.29 | 312.4 | 2.73 | 4.17 | 353.5 | 7.05 |
| 2.55 | 303.2 | 2.20 | 3.29 | 323.5 | 3.48 | 4.17 | 358.7 | 8.31 |
| 2.55 | 313.2 | 2.77 | 3.29 | 333.2 | 4.31 | 4.17 | 363.2 | 9.36 |

[NBu<sup>n</sup><sub>4</sub>][BF<sub>4</sub>](1) + CH<sub>2</sub>FCF<sub>3</sub>(2)

|      |       |      |      |       |      |      |       |      |
|------|-------|------|------|-------|------|------|-------|------|
| 1.33 | 333.7 | 1.99 | 2.62 | 363.4 | 3.67 | 3.91 | 378.2 | 6.14 |
| 1.33 | 343.0 | 2.45 | 2.62 | 368.0 | 4.14 | 3.91 | 383.0 | 6.97 |
| 1.33 | 352.9 | 3.01 | 2.62 | 374.5 | 5.12 | 5.14 | 323.2 | 1.57 |
| 1.33 | 363.0 | 3.64 | 2.62 | 378.2 | 5.76 | 5.14 | 333.4 | 1.97 |
| 1.33 | 367.9 | 4.04 | 2.62 | 383.2 | 6.54 | 5.14 | 343.2 | 2.43 |
| 1.33 | 373.8 | 4.76 | 3.91 | 323.7 | 1.59 | 5.14 | 353.4 | 3.00 |
| 1.33 | 377.7 | 5.27 | 3.91 | 333.3 | 1.96 | 5.14 | 363.4 | 3.66 |
| 1.33 | 381.9 | 5.94 | 3.91 | 343.5 | 2.43 | 5.14 | 368.2 | 4.63 |
| 2.62 | 322.5 | 1.54 | 3.91 | 353.5 | 2.96 | 5.14 | 374.3 | 5.59 |
| 2.62 | 333.6 | 1.99 | 3.91 | 363.6 | 3.63 | 5.14 | 378.2 | 6.49 |
| 2.62 | 343.6 | 2.48 | 3.91 | 368.2 | 4.34 | 5.14 | 383.2 | 7.37 |
| 2.62 | 353.6 | 3.02 | 3.91 | 374.4 | 5.38 |      |       |      |

---

Table S2 Experimental  $p$ - $T$  data for the binary systems of  $[\text{NBu}^n_4][\text{B}\{3,5\text{-C}_6\text{H}_3(\text{CF}_3)_2\}_4] + \text{HFC}$

| $x_1 \times 10^3$                                                                                         | $T/\text{K}$ | $p/\text{MPa}$ | $x_1 \times 10^3$ | $T/\text{K}$ | $p/\text{MPa}$ | $x_1 \times 10^3$ | $T/\text{K}$ | $p/\text{MPa}$ |
|-----------------------------------------------------------------------------------------------------------|--------------|----------------|-------------------|--------------|----------------|-------------------|--------------|----------------|
| $[\text{NBu}^n_4][\text{B}\{3,5\text{-C}_6\text{H}_3(\text{CF}_3)_2\}_4](1) + \text{CH}_2\text{F}_2(2)$   |              |                |                   |              |                |                   |              |                |
| 1.65                                                                                                      | 296.8        | 1.86           | 1.65              | 333.3        | 4.26           | 1.65              | 353.6        | 6.77           |
| 1.65                                                                                                      | 302.2        | 2.13           | 1.65              | 342.8        | 5.19           | 1.65              | 358.0        | 7.60           |
| 1.65                                                                                                      | 312.5        | 2.70           | 1.65              | 348.2        | 5.84           | 1.65              | 363.2        | 8.69           |
| 1.65                                                                                                      | 323.0        | 3.47           | 1.65              | 350.6        | 6.22           |                   |              |                |
| $[\text{NBu}^n_4][\text{B}\{3,5\text{-C}_6\text{H}_3(\text{CF}_3)_2\}_4](1) + \text{CH}_2\text{FCF}_3(2)$ |              |                |                   |              |                |                   |              |                |
| 2.58                                                                                                      | 325.0        | 1.65           | 2.58              | 354.4        | 2.98           | 2.58              | 378.5        | 5.82           |
| 2.58                                                                                                      | 334.6        | 2.01           | 2.58              | 365.3        | 3.73           | 2.58              | 383.8        | 6.58           |
| 2.58                                                                                                      | 343.1        | 2.43           | 2.58              | 369.2        | 4.31           |                   |              |                |
| 2.58                                                                                                      | 346.1        | 2.56           | 2.58              | 374.7        | 5.16           |                   |              |                |

Table S3 Experimental  $p$ - $T$  data for the binary systems of Na[B{3,5-C<sub>6</sub>H<sub>3</sub>(CF<sub>3</sub>)<sub>2</sub>}<sub>4</sub>] + HFC

| $x_1 \times 10^3$                                                                                                                 | $T/K$ | $p/\text{MPa}$ | $x_1 \times 10^3$ | $T/K$ | $p/\text{MPa}$ | $x_1 \times 10^3$ | $T/K$ | $p/\text{MPa}$ |
|-----------------------------------------------------------------------------------------------------------------------------------|-------|----------------|-------------------|-------|----------------|-------------------|-------|----------------|
| Na[B{3,5-C <sub>6</sub> H <sub>3</sub> (CF <sub>3</sub> ) <sub>2</sub> } <sub>4</sub> ](1) + CH <sub>2</sub> F <sub>2</sub> (2)   |       |                |                   |       |                |                   |       |                |
| 1.62                                                                                                                              | 296.3 | 1.89           | 1.62              | 333.2 | 4.33           | 1.62              | 353.1 | 6.65           |
| 1.62                                                                                                                              | 303.0 | 2.23           | 1.62              | 343.4 | 5.33           | 1.62              | 358.2 | 7.36           |
| 1.62                                                                                                                              | 313.2 | 2.82           | 1.62              | 348.2 | 5.92           | 1.62              | 363.2 | 8.15           |
| 1.62                                                                                                                              | 323.2 | 3.51           | 1.62              | 351.4 | 6.38           |                   |       |                |
| Na[B{3,5-C <sub>6</sub> H <sub>3</sub> (CF <sub>3</sub> ) <sub>2</sub> } <sub>4</sub> ](1) + CH <sub>2</sub> FCF <sub>3</sub> (2) |       |                |                   |       |                |                   |       |                |
| 2.59                                                                                                                              | 329.5 | 1.83           | 2.59              | 363.2 | 3.65           | 2.59              | 378.5 | 5.33           |
| 2.59                                                                                                                              | 333.6 | 1.95           | 2.59              | 365.0 | 3.76           | 2.59              | 383.4 | 5.97           |
| 2.59                                                                                                                              | 343.9 | 2.45           | 2.59              | 368.9 | 4.06           |                   |       |                |
| 2.59                                                                                                                              | 353.8 | 3.02           | 2.59              | 374.9 | 4.85           |                   |       |                |
